# Supplementary material for: Leishmanicidal Potential of Hardwickiic Acid Isolated From Croton sylvaticus
Source: Front Pharmacol. 2020 May 25;11:753. doi: 10.3389/fphar.2020.00753 (PMC7261830; doi:10.3389/fphar.2020.00753)
Supplement: Supplementary file 1 [file DataSheet_1.docx]

**SUPPLEMENTARY MATERIAL**

## **Leishmanicidal potential of hardwickiic acid isolated from *Croton sylvaticus***

Crentsil Justice Afrifa1,Lauve Rachel Tchokouaha Yamthe2,3,4, Barbara Zenabu Anibea1, Emmanuel Broni5, Samuel Kojo Kwofie5,6,7,8*,John Kweku AmissahTetteh9, Dorcas Osei-Safo1

1Chemistry Department, School of Physical and Mathematical Sciences, College of Basic and Applied Sciences (CBAS), University of Ghana, P. O. Box LG 56, Legon, Accra, Ghana

2Institute for Medical Research and Medicinal Plants Studies, P.O. Box 13033, Yaoundé, Cameroon

3Department of Parasitology, Noguchi Memorial Institute for Medical Research, College of Health Sciences, University of Ghana, LG581, Legon, Accra, Ghana

4Antimicrobial and Biocontrol Agents Unit, University of Yaoundé 1, P. O. Box 812, Yaoundé, Cameroon

5Department of Biomedical Engineering, School of Engineering Sciences, CBAS, University of Ghana, PMB LG77, Legon, Accra, Ghana

6West African Center for Cell Biology of Infectious Pathogens, Department of Biochemistry, Cell and Molecular Biology, CBAS, University of Ghana, LR54, Accra, Ghana

7Department of Medicine, Loyola University Medical Center, Maywood, IL 60153, USA

8 Department of Physics and Engineering Science, Coastal Carolina University, Conway, SC 29528

**9Department of Immunology, Noguchi Memorial Institute for Medical Research, College of Health Sciences, University of Ghana, LG581, Legon, Accra, Ghana**

**Table of Contents**

**Figure S1**. MS of **HA**

**Figure S2**. 13C-NMR spectrum (126 MHz, CDCl3) of **HA**

**Figure S3:** Flow cytometry analysis of promastigotes following treatment with HA and after labelling with annexin-v and pi (compound treated L. major promastigote).

**Figure S4:** Flow cytometry analysis of promastigotes following treatment with HA and after labelling with annexin-v and pi (untreated L. donovani promastigote).

**Figure S5**: Flow cytometry analysis of promastigotes following treatment with HA and after labelling with annexin-v and pi (compound treated L. donovani promastigote).

Figure S6: ERRAT Quality Plots of the selected models: (A) *Ld*TR III, (B) *Lm*TR I, (C) *Ld*GCL V and (D) *Lm*GCL. Green peaks show the passed values, yellow signifies the regions with warning and red peaks represent the regions with error values.

Figure S7: Ramachandran plot of the 4 modelled receptors obtained via RAMPAGE: (A) *Lm*TR I, (B) *Ld*GCL V and (C) *Lm*GCL. The plots evaluate the number of residues in the favoured, allowed and outlier regions.

Figure S8: The binding poses of hardwikiic acid in the binding cavities of *Lm*PTR1 (A), *Ld*TR III (B), *Lm*TR I (C), *Ld*GCL (D) and *Lm*GCL (E). The receptors are represented as a surface whiles hardwickiic acid as sticks.

Figure S9: 2D representations of Protein-ligand interaction between hardwickiic acid and the receptors: (A) *Lm*PTR1, (B) *Ld*GCL V and (C) *Lm*GCL V. Hydrogen bonds are shown with green dash lines and hydrophobic contacts are shown as red spike arcs.

Table S1: Dope Scores of Generated Models of *Ld*TR, *Lm*TR, *Ld*GCL and *Lm*GCL. The models with the least DOPE scores were selected as the plausible structures.

**Table S2**: Predicted binding sites for the 4 modelled receptors using CASTp. The sizes of the volumes, areas and residues lining the pockets are provided

**Figure S1**. MS of **HA**

**
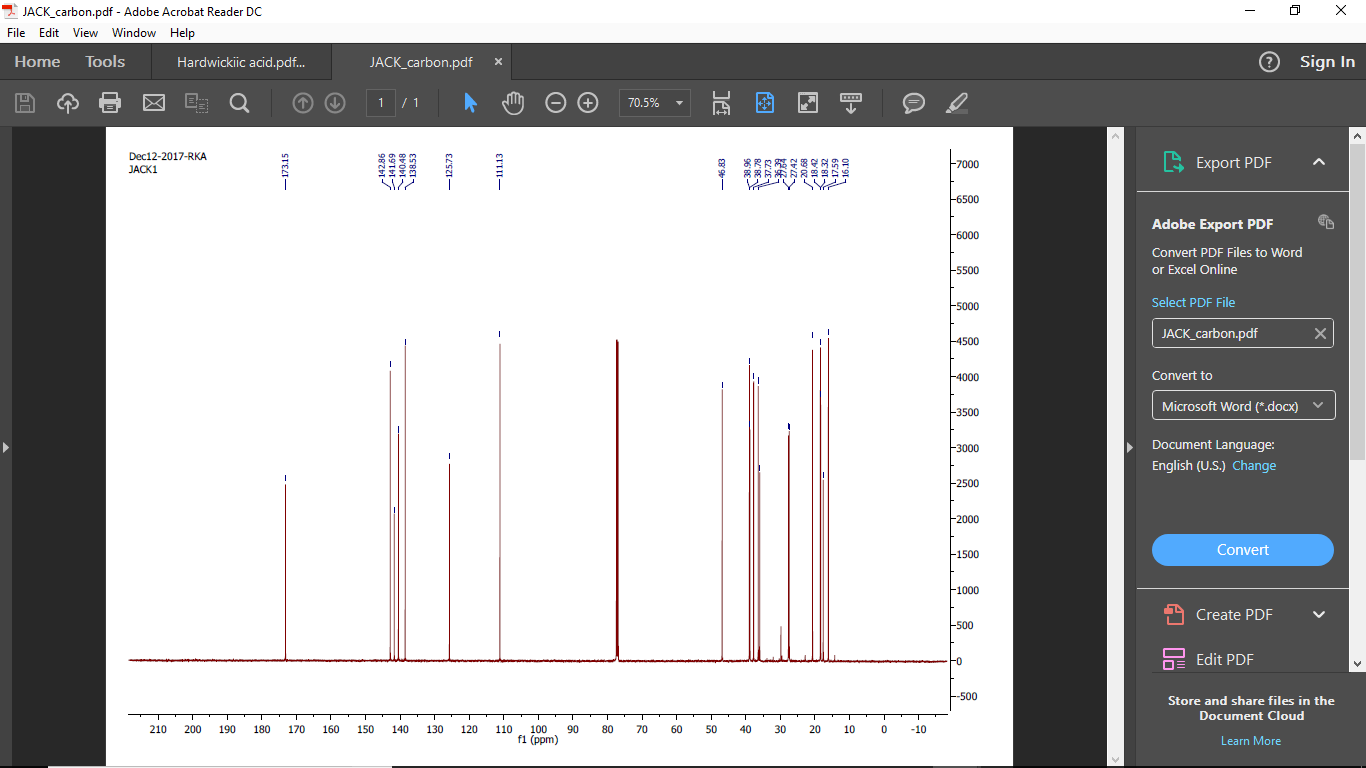
Figure S2**. 13C-NMR spectrum (126 MHz, CDCl3) of **HA**

**
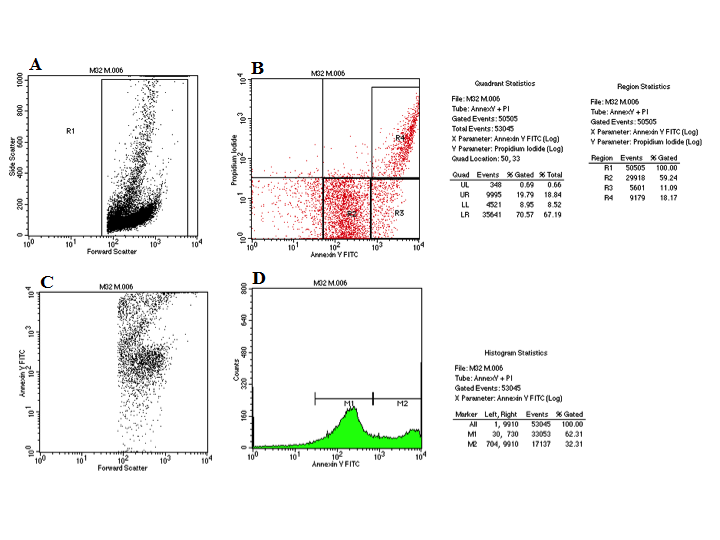
**

Figure S3: Flow cytometry analysis of promastigotes following treatment with HA and after labeling with annexin-v and pi (compound treated L. major promastigote).

**
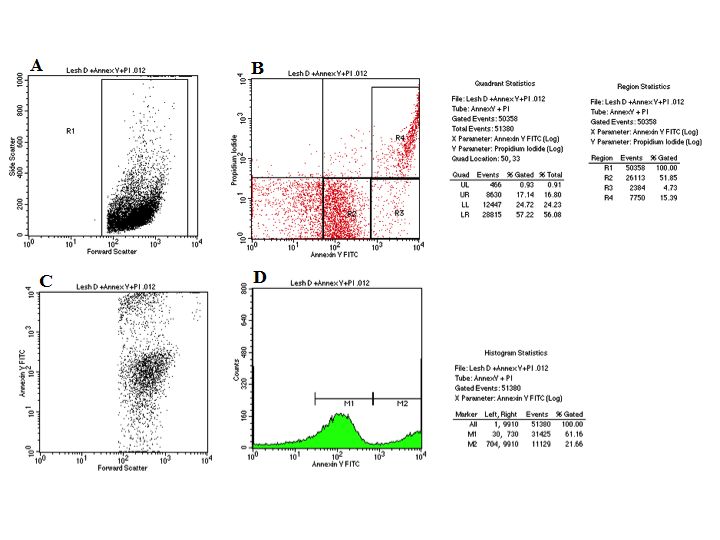
**

Figure S4: Flow cytometry analysis of promastigotes following treatment with HA and after labeling with annexin-v and pi (untreated L. donovani promastigote).

**
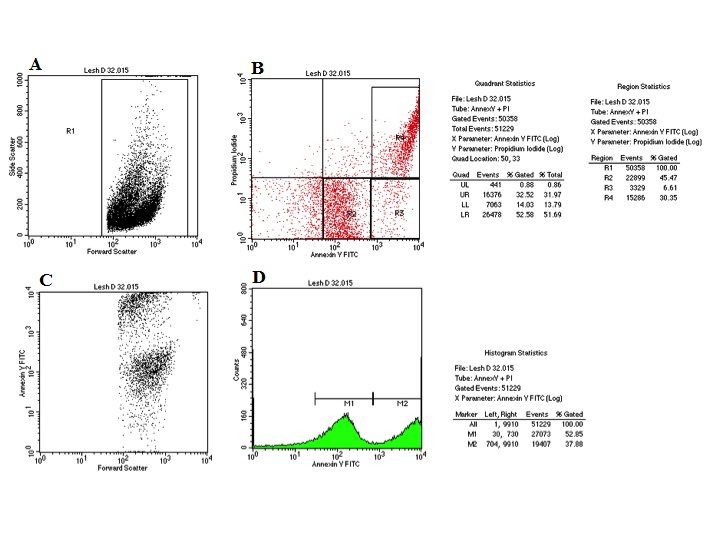
**

Figure S5: Flow cytometry analysis of promastigotes following treatment with HA and after labeling with annexin-v and pi (compound treated L. donovani promastigote).

**A**


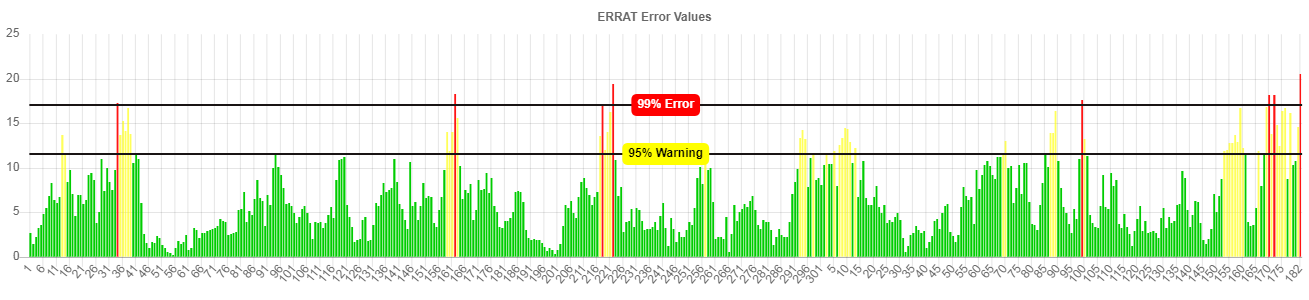


**B**


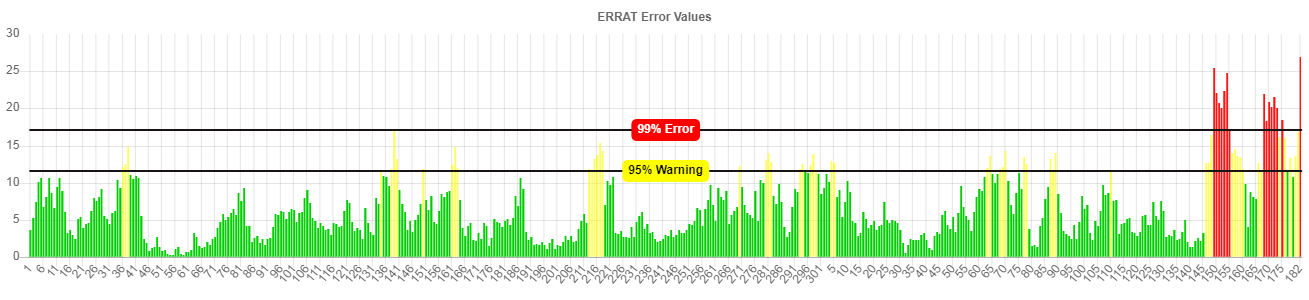


**C**


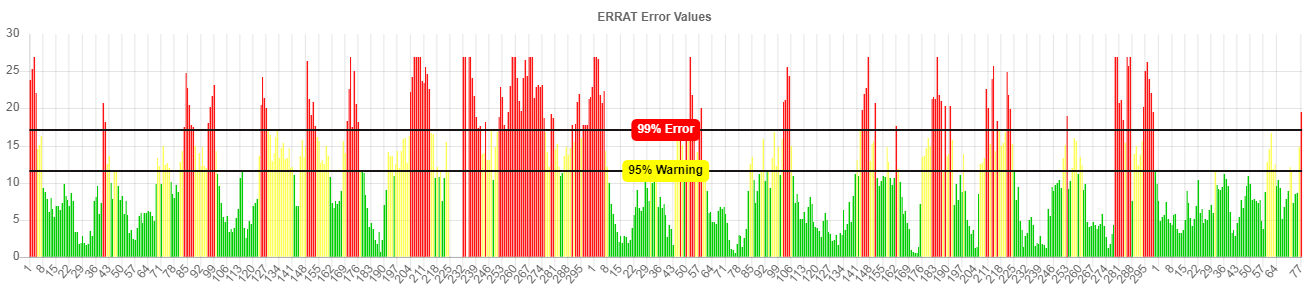


**D**

**
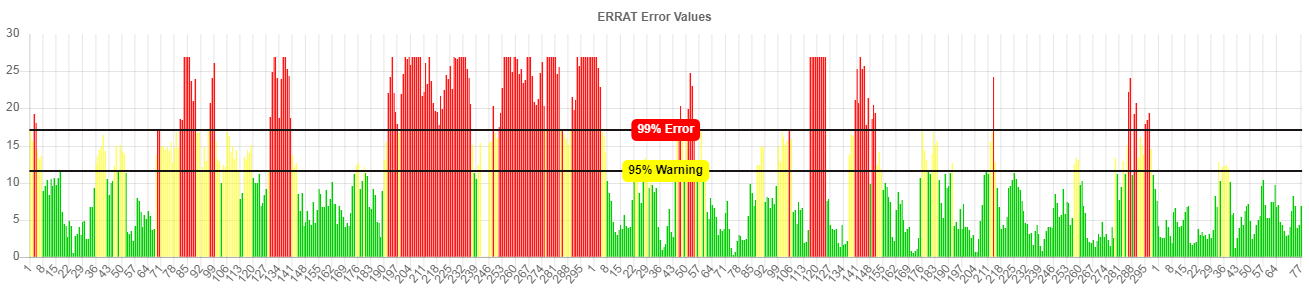
**

Figure S6: ERRAT Quality Plots of the selected models: (A) *Ld*TR III, (B) *Lm*TR I, (C) *Ld*GCL V and (D) *Lm*GCL. Green peaks show the passed values, yellow signifies the regions with warning and red peaks represent the regions with error values.

# A


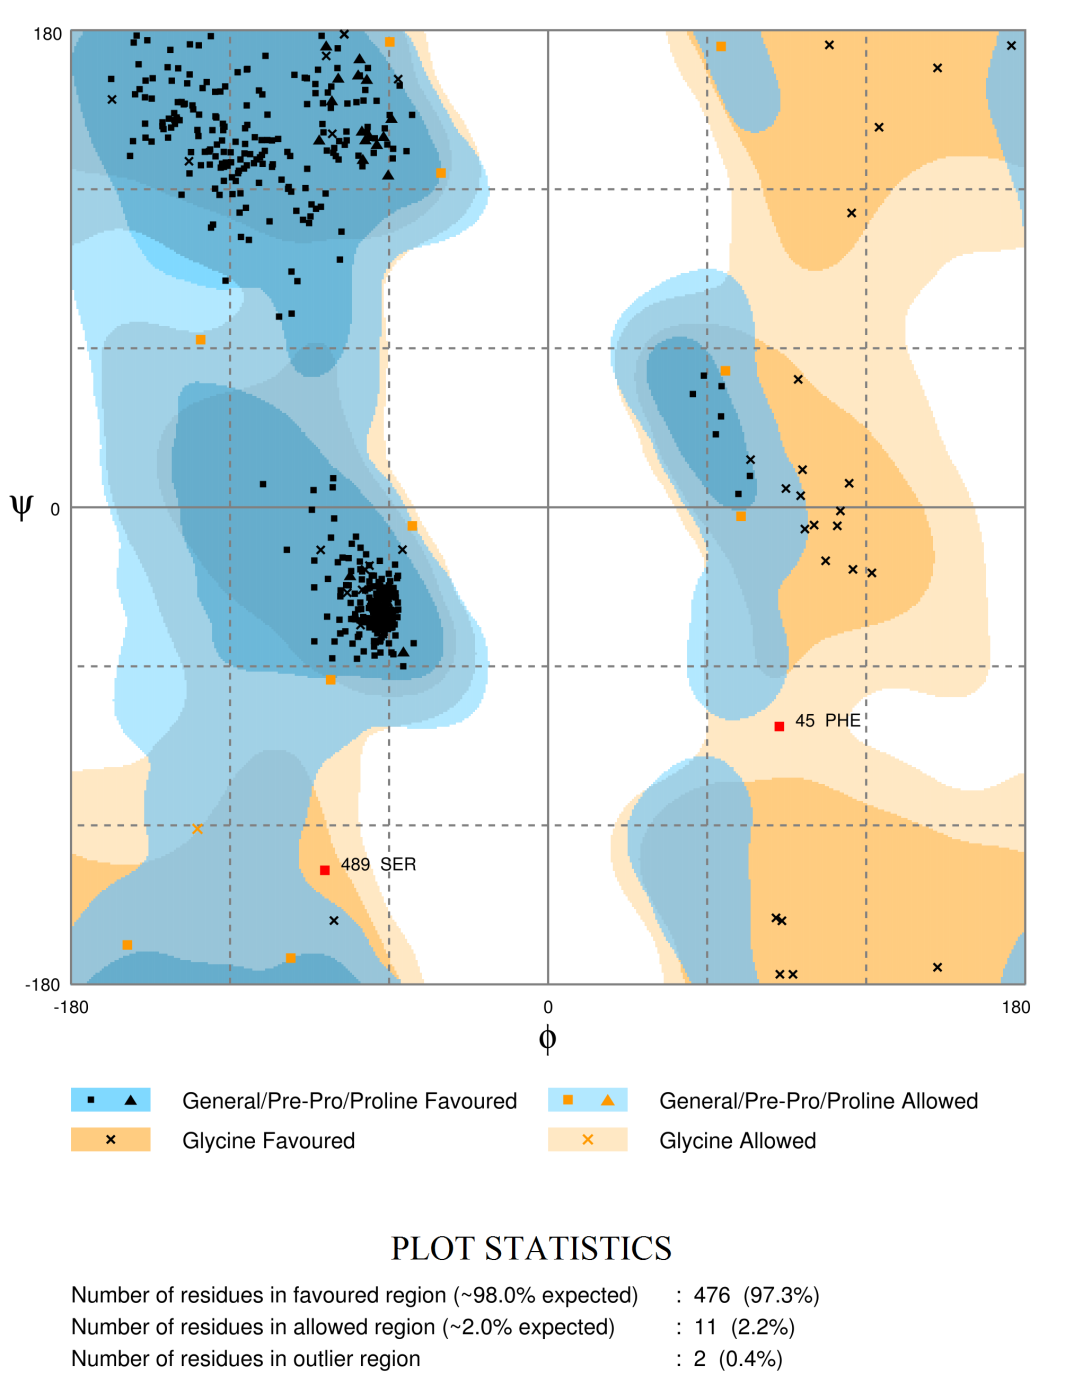


# B

#
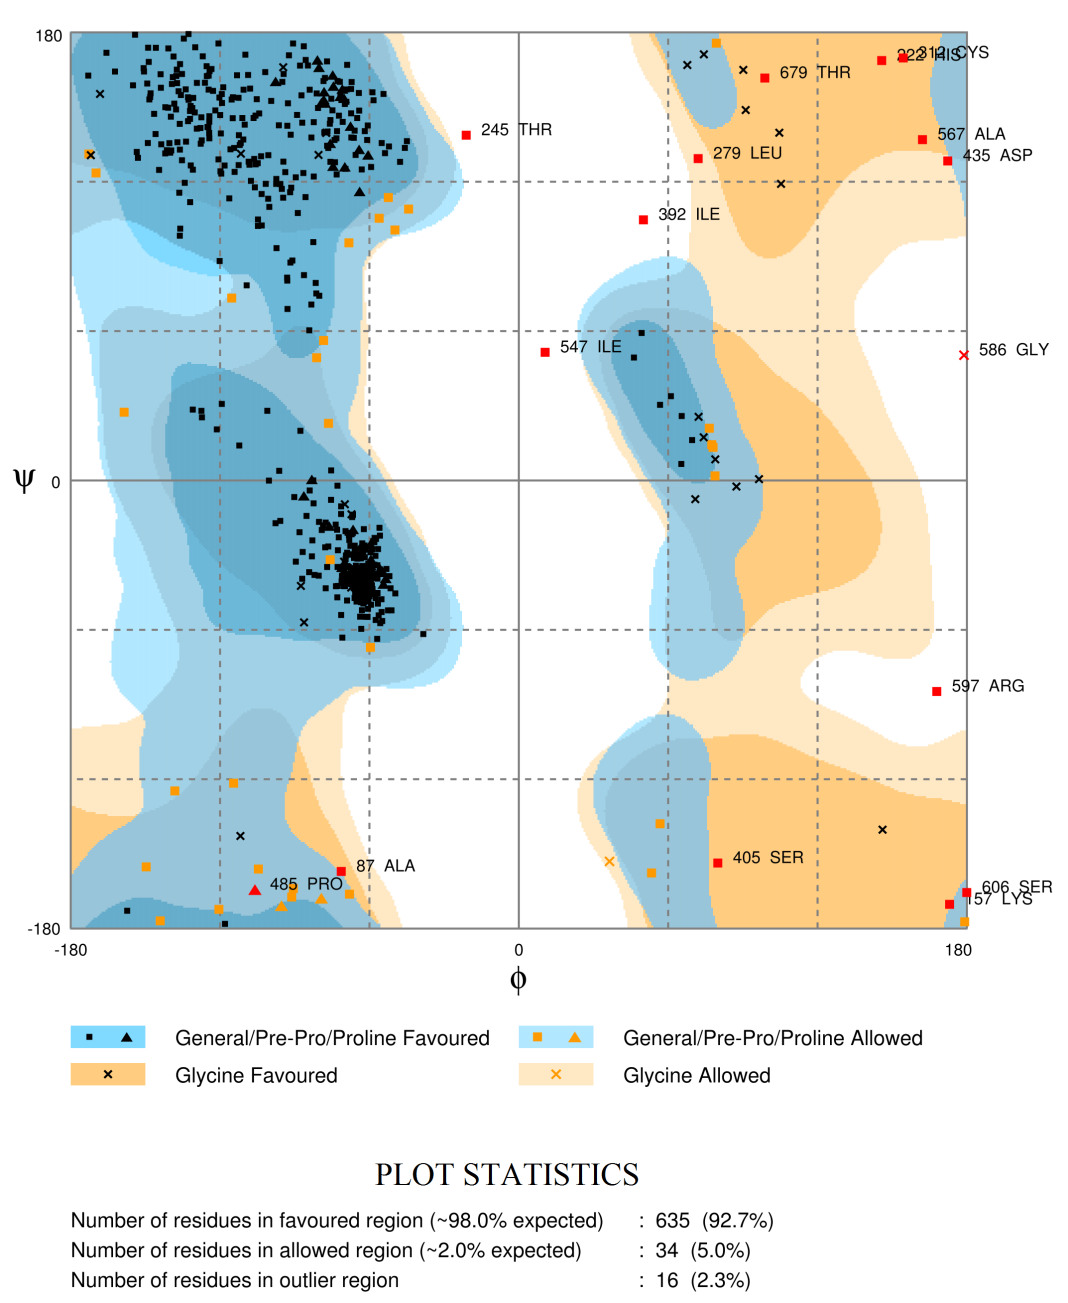


**C**

**
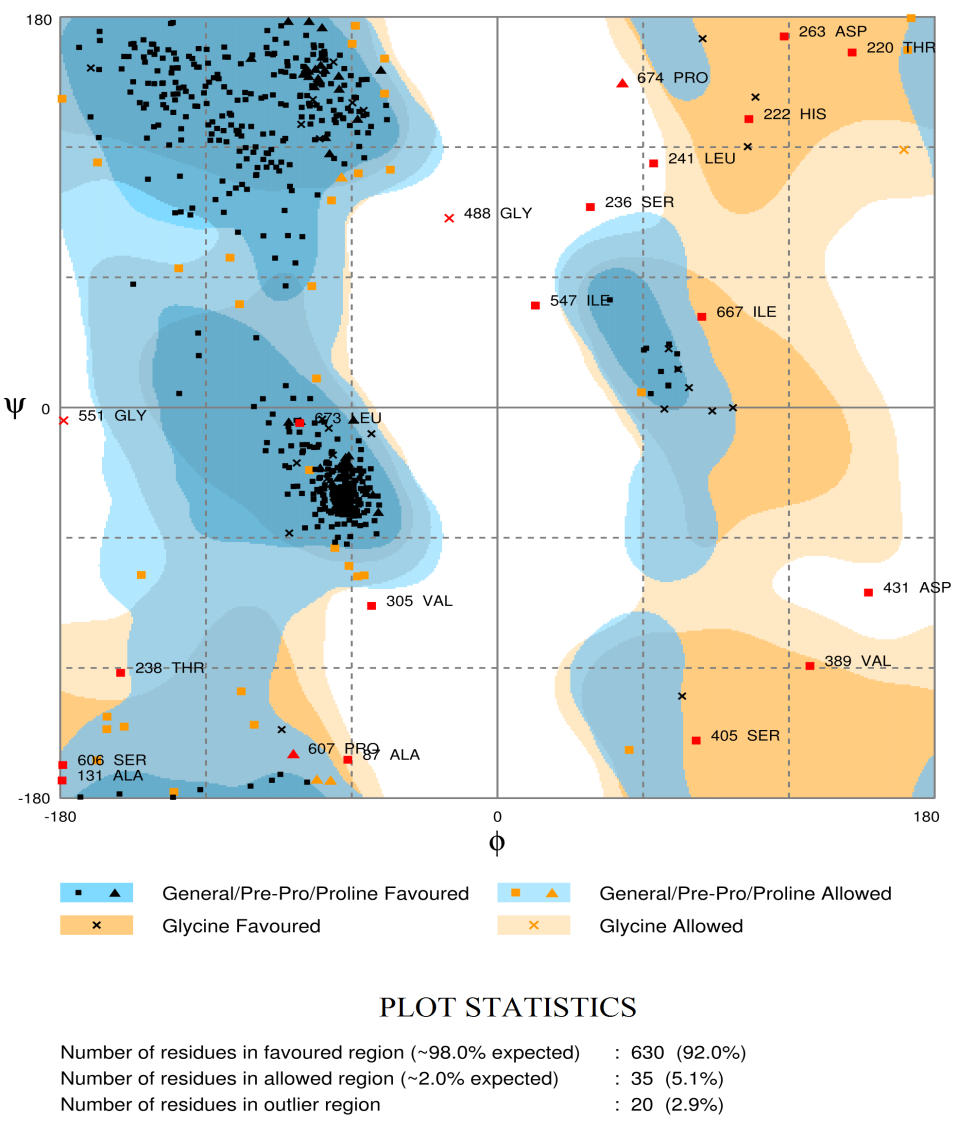
**

Figure S7: Ramachandran plot of the 4 modelled receptors obtained via RAMPAGE: (A) *Lm*TR I, (B) *Ld*GCL V and (C) *Lm*GCL. The plots evaluate the number of residues in the favoured, allowed and outlier regions.

**A LmPTR1**

**
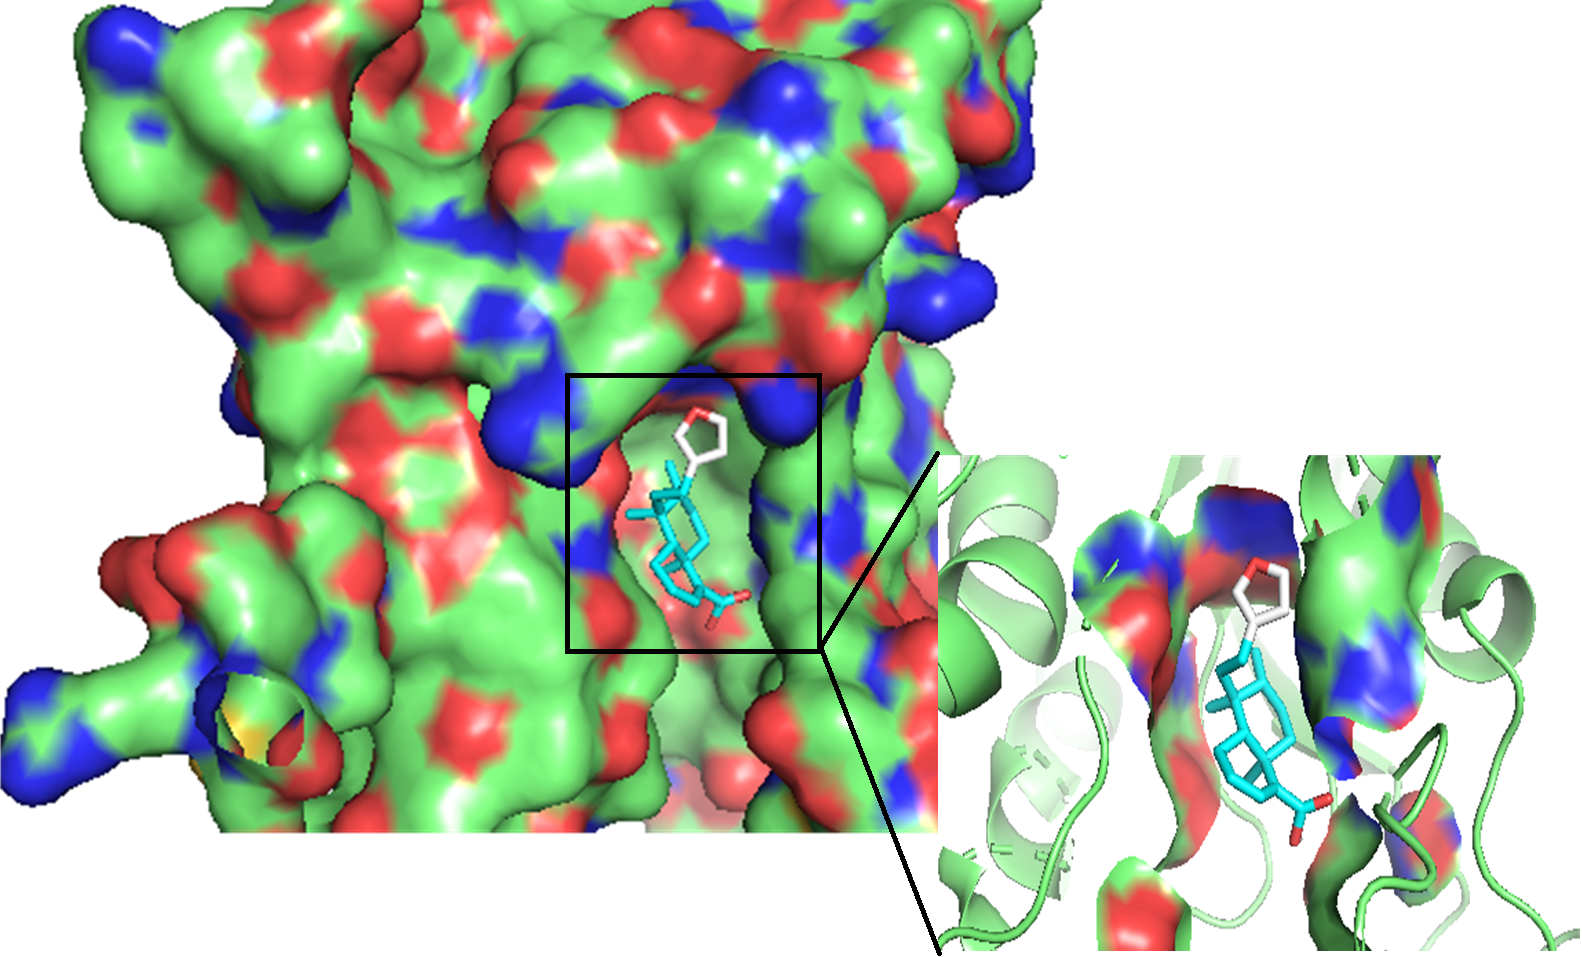
**

**B LdTR III**

**
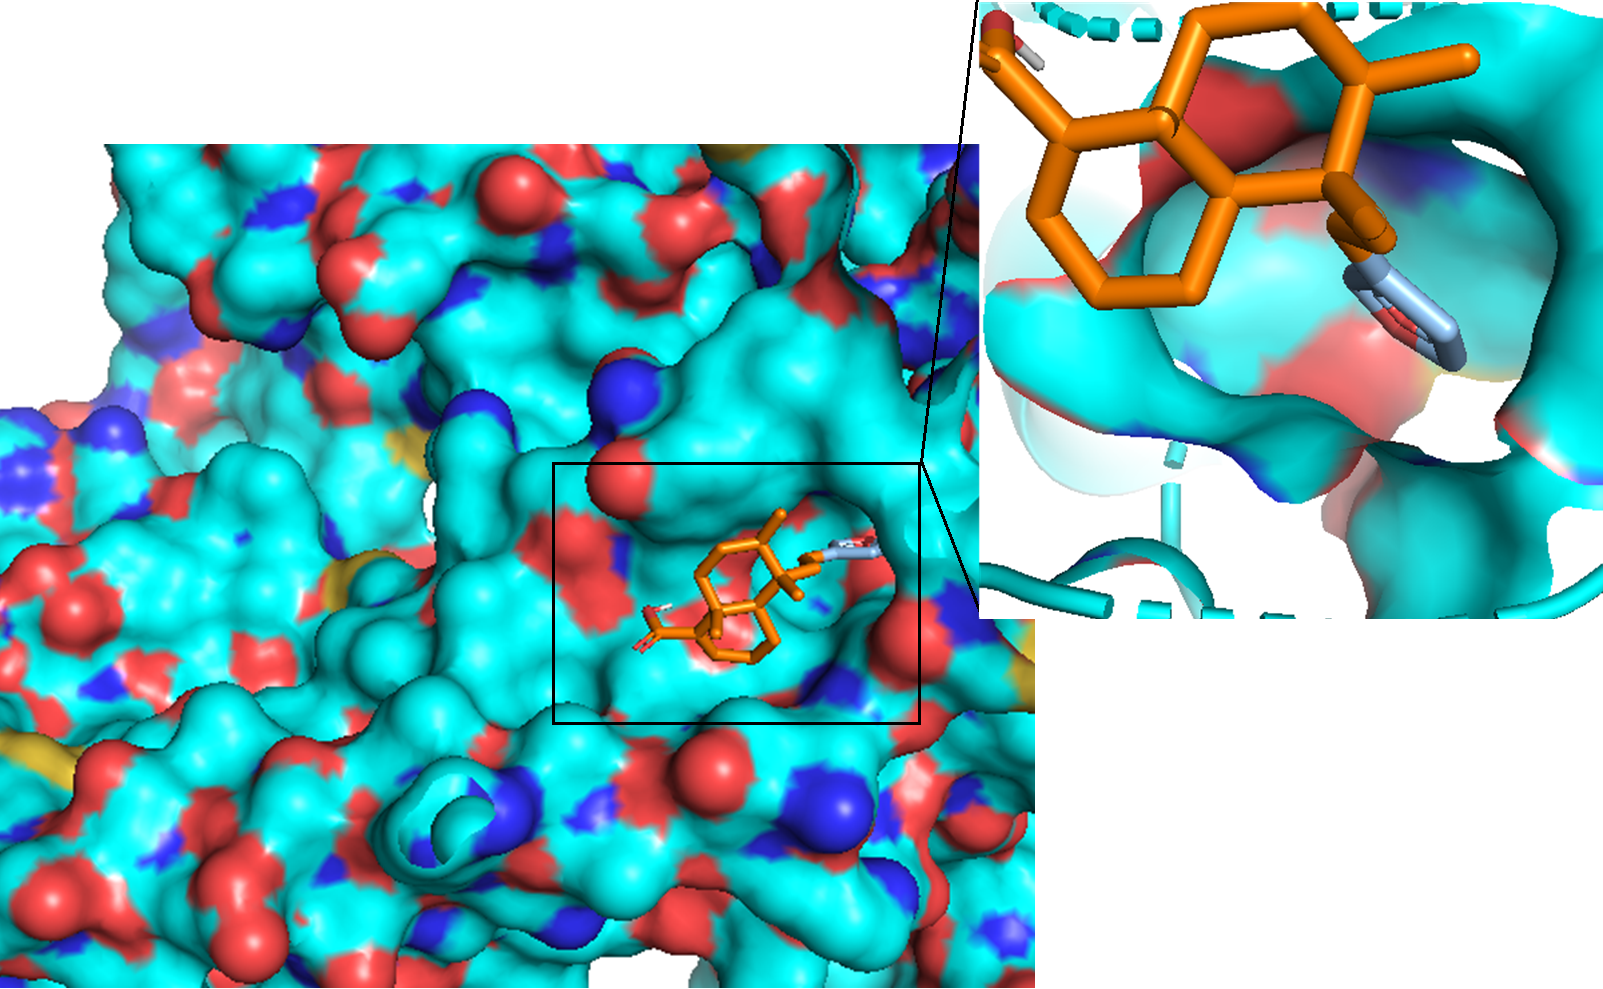
**

**C LmTR I**

**
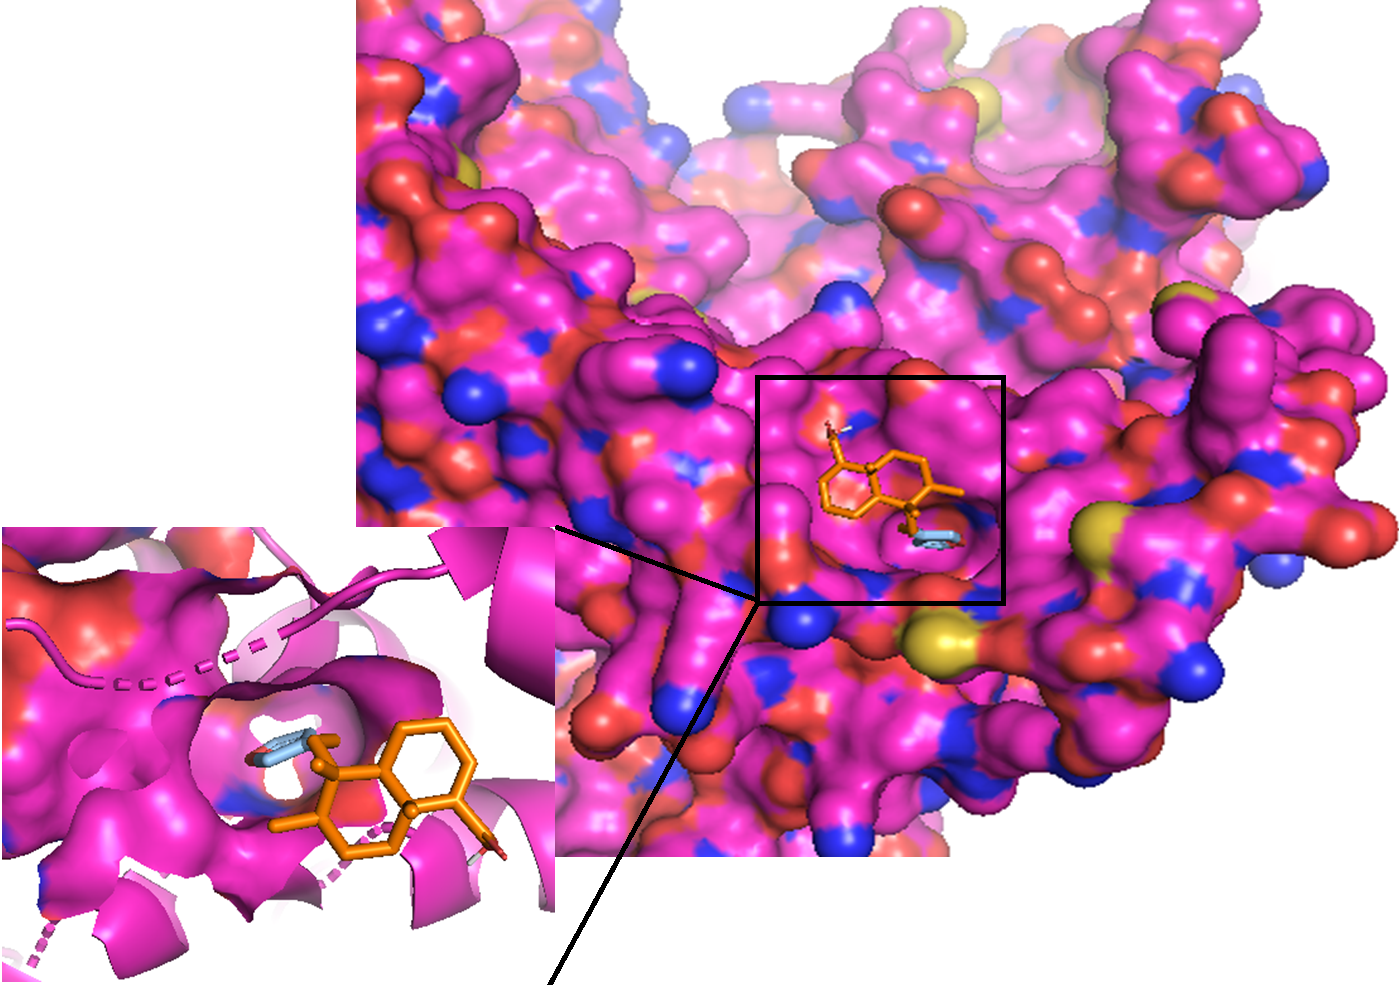
**

**D LdGCL
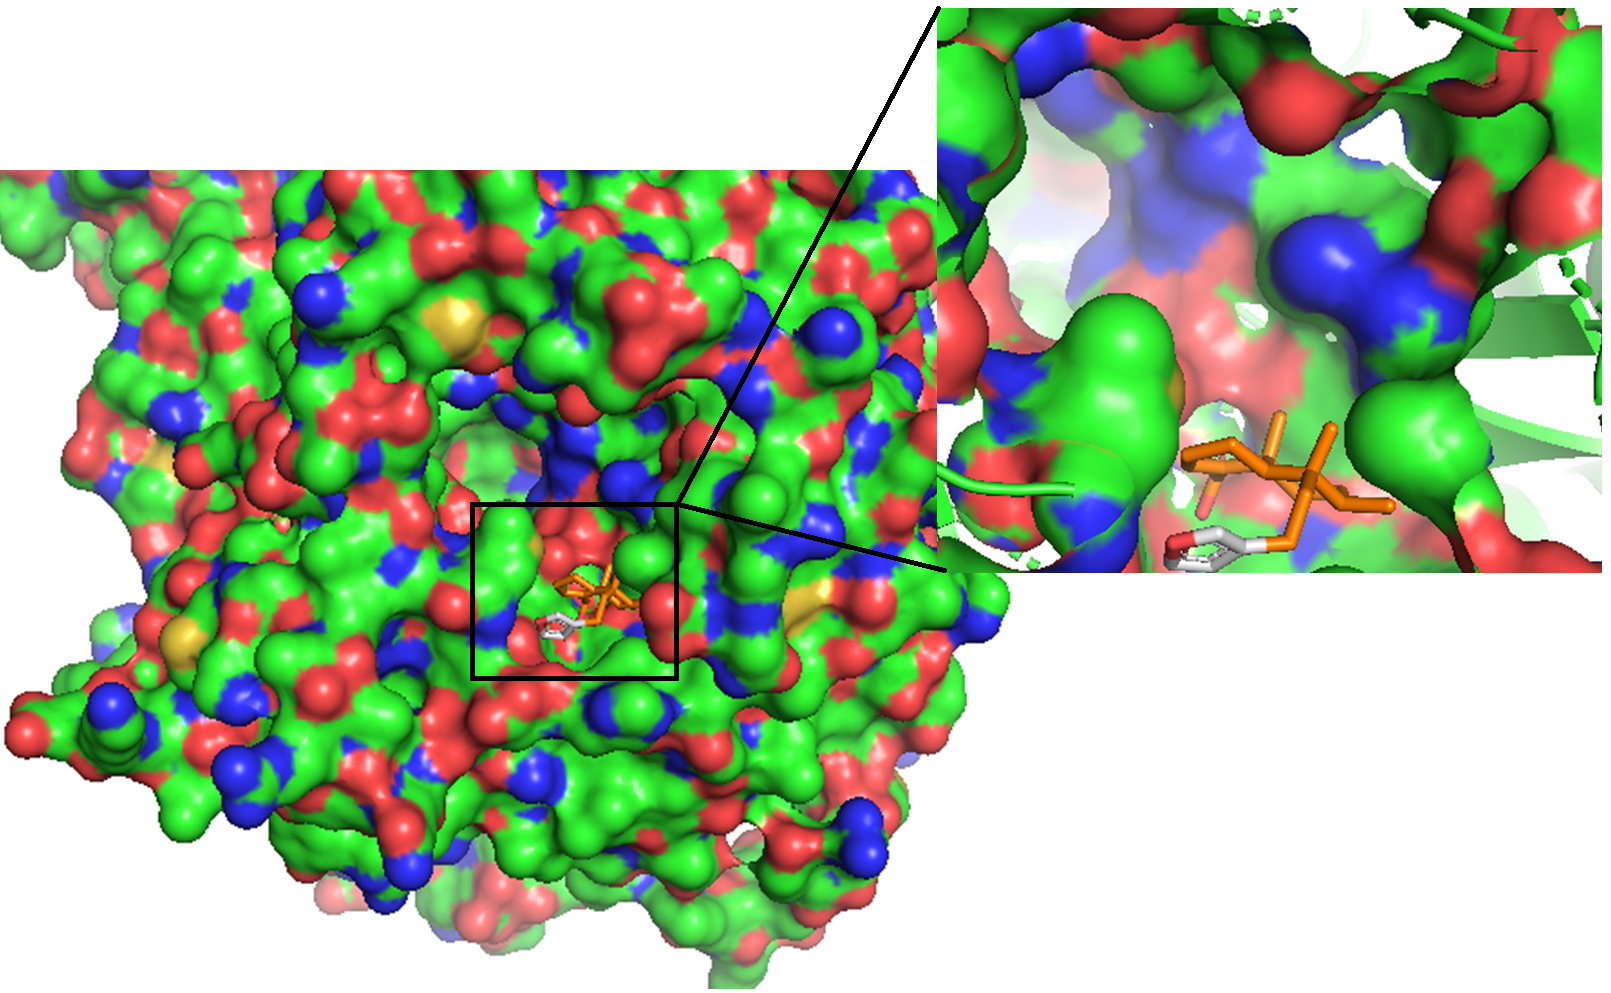
**

**E *Lm*GCL**

**
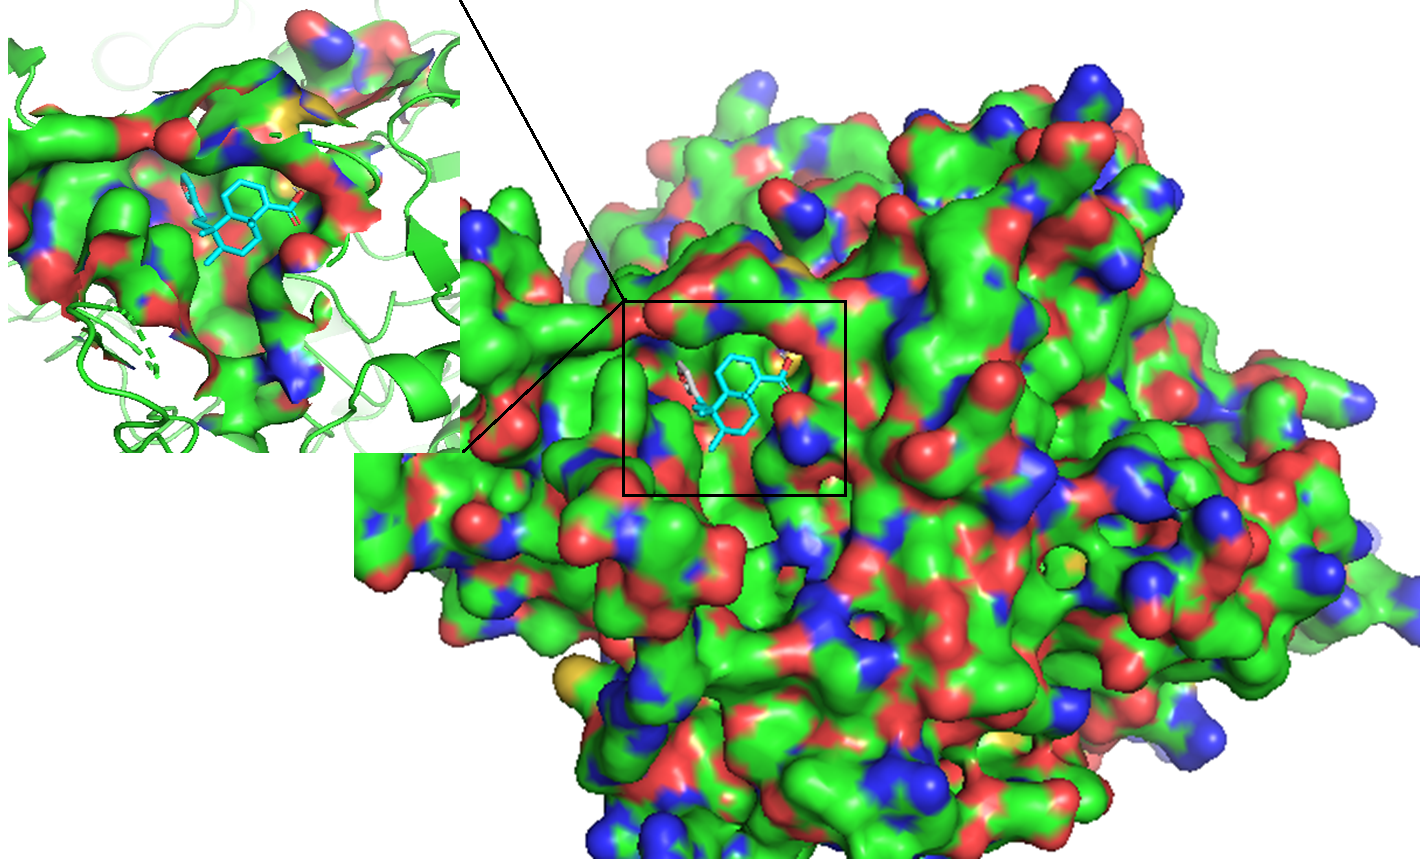
**

Figure S8: The binding pose of hardwikiic acid in the binding cavities of *Lm*PTR1 (A), *Ld*TR III (B), *Lm*TR I (C), *Ld*GCL (D) and *Lm*GCL (E). The receptors are represented as a surface whiles hardwickiic acid as sticks.

**A**


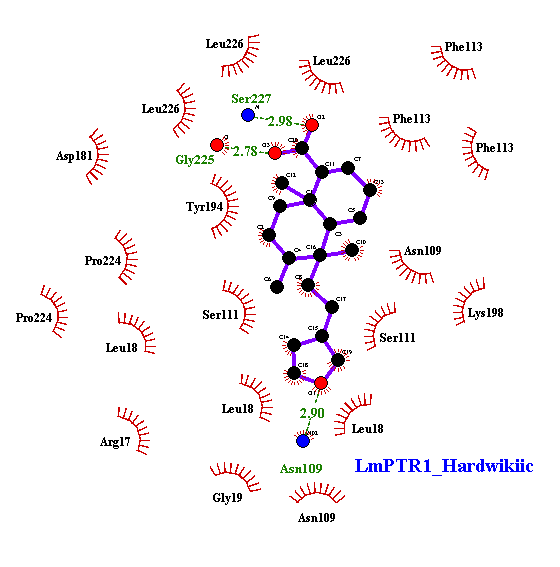


**B**

**
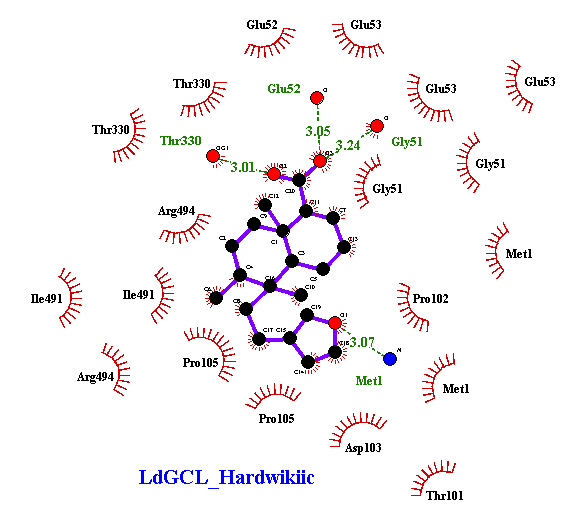
**

**C**

**
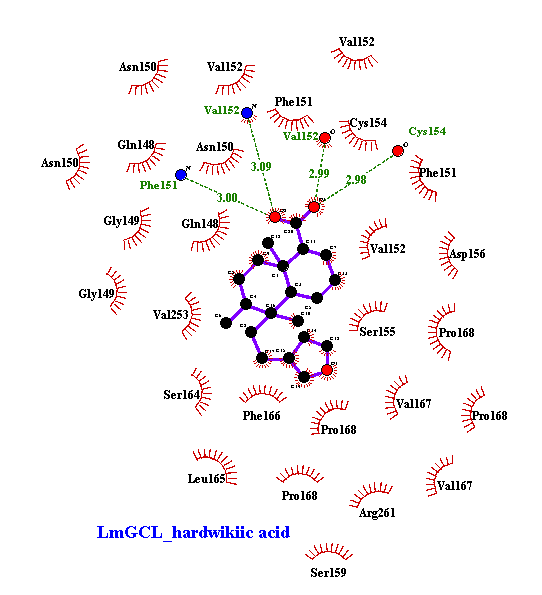
**

Figure S9: 2D representations of Protein-ligand interaction between hardwickiic acid and the receptors: (A) *Lm*PTR1, (B) *Ld*GCL V and (C) *Lm*GCL V. Hydrogen bonds are shown with green dash lines and hydrophobic contacts are shown as red spike arcs.

Table S1: Dope Scores of Generated Models of *Ld*TR, *Lm*TR and *Ld*GCL. The models with the least DOPE scores were selected as the plausible structures.

| **SCORES** | **MODELS** | | | | |
| --- | --- | --- | --- | --- | --- |
| ***L. donovani* Trypanothione reductase (*Ld*TR)** | | | | | |
|  | ***Ld*TR I** | ***Ld*TR II** | ***Ld*TR III** | ***Ld*TR IV** | ***Ld*TR V** |
| **DOPE score** | -52937.51172 | -52808.47656 | -53014.12500 | -52638.96484 | -52499.44141 |
| ***L. major* Trypanothione reductase (*Lm*TR)** | | | | | |
|  | ***Lm*TR I** | ***Lm*TR II** | ***Lm*TR III** | ***Lm*TR IV** | ***Lm*TR V** |
| **DOPE score** | -53008.44531 | -52964.11719 | -52707.29297 | -52769.12109 | -52834.90625 |
| ***L. donovani* Glutamate cysteine ligase (*Ld*GCL)** | | | | | |
|  | ***Ld*GCL I** | ***Ld*GCL II** | ***Ld*GCL III** | ***Ld*GCL IV** | ***Ld*GCL V** |
| **DOPE score** | -71943.04688 | -72709.16406 | -72252.65625 | -70272.20313 | -73083.05469 |
| ***L. major*** **Glutamate cysteine ligase (*Lm*GCL)** | | | | | |
|  | ***Lm*GCL I** | ***Lm*GCL II** | ***Lm*GCL III** | ***Lm*GCL IV** | ***Lm*GCL V** |
| **DOPE score** | -72157.15625 | -71900.67969 | -72528.82813 | -72161.99219 | -73102.12500 |

Table S2: Predicted binding sites for the 3 modelled receptors using CASTp. The sizes of the volumes, areas and residues lining the pockets are provided.

| **RECEPTOR** | **POCKET No.** | **Volume** | **Pocket**  **Area** | **RESIDUES** |
| --- | --- | --- | --- | --- |
| *Ld*TR III | 1 | 6104.8 | 3148.9 | Leu10, Gly11, Ala12, Gly13, Ser14, Gly15, Gly16, Val34, Asp35, Val36, Leu44, Phe45, Ala46, Ala47, Gly50, Thr51, Cys52, Val55, Gly56, Cys57, Lys60, Lys61, Gly125, Phe126, Gly127, Glu141, Ala159, Thr160, Gly161, Ser162, Trp163, Pro164, Thr165, Arg166, Leu167, Thr177, Ser178, Asn179, Phe182, Val194, Gly195, Gly196, Gly197, Tyr198, Ile199, Ala200, Glu202, Phe203, Tyr221, Arg222, Leu227, Arg228, Gly229, Phe230, Leu253, Asn254, Pro255, Leu283, Ala284, Ile285, Gly286. Arg287, Val288, Pro289, Arg290, Gln292, Ala293, Leu294, Lys305, Asn306, Gln310, Val311, Ile325, Gly326, Asp327, Thr329, Asn330, Arg331, Val332, Met333, Leu334, Thr335, Pro336, Val337, Ala338, Asn340, Glu341, Thr357, Asp358, His359, Thr360, Lys361, Val362, Ala363, Cys364, Ala365, Val366, Phe367, Thr374, Cys375, Gly376, Met377, Thr378, Glu380, Glu381, Lys384, His428, Gln439, Gly442, Ile443, Lys446. |
| 2 | 439.4 | 222.6 | Phe174, Ile176, Tyr183, Leu184, Glu185, Asp186, Pro188, Lys260, Asp263, Gly264, Ser265, Asn266, Asp279, Gln280. |
| 3 | 378.8 | 228.4 | Ile437, Ser440, Val441, Cys444, Ala449, Asp453, Phe454, Thr457, Ile458, Gly459, Val460, Ala465, Glu466, Leu468, Cys469. |
| 4 | 49.123 | 101.965 | Lys61, Val64, Thr65, Gln68, Asp71, Leu72, Glu75, Phe367, Ser368, Ile369, Pro370, Pro371, His401, Lys409, Asp432, Pro435. |
| *Lm*TR I | 1 | 3604.3 | 2113.3 | Leu10, Gly11, Ala12, Gly13, Ser14, Gly15, Gly16, Val34, Asp35, Val36, Phe44, Ala46, Ala47, Gly50, Thr51, Cys52, Val55, Gly56, Cys57, Lys60, Gly125, Phe126, Gly127, Glu141, Ala159, Thr160, Gly161, Ser162, Trp163, Ser178, Phe182, Gly195, Gly196, Gly197, Tyr198, Ile199, Glu202, Phe203, Tyr221, Arg222, Leu227, Arg228, Gly229, Phe230, Asp231, Ala284, Ile285, Gly286, Arg287, Arg290, Thr293, Leu294, Ile325, Gly326, Asp327, Asn330, Arg331, Val332, Met333, Leu334, Thr335, Pro336, Val337, Ala338, Asn340, Arg355, Ala356, Thr357, Asp358, His359, Thr360, Lys361, Val362, Ala363, Cys364, Ala365, Val366, Phe367, Thr374, Cys375, Gly376, Met377, Thr378, Glu381, His428, Gln439, Gly442, Ile443, Lys446. |
| 2 | 389.6 | 218.9 | Ile437, Ser440, Val441, Cys444, Ala449, Asp453, Phe454, Thr457, Ile458, Gly459, Val460, Ala465, Glu466, Leu468, Cys469. |
| 3 | 287.5 | 125.7 | Leu184, Glu185, Asp186, Ala187, Pro188, Lys189, Asp263, Gly264, Ser265, Asp279, Asp279, Gln280 |
| 4 | 437.3 | 307.9 | Gly66, Ala67, Tyr69, Met70, Ile73, Arg74, Arg85, Glu86, Leu88, Cys89, Pro90, Asn208, Gly209, Tyr210, Lys211, Pro212, Arg213. |
| *Ld*GCL V | 1 | 5171.6 | 2193.8 | Arg190, Cys195, Val196, Leu197, Val198, Pro199, Leu200, Tyr201, Met202, Ser204, Arg205, Thr206, Met207, Gln208, Asp218, Thr220, His222, Asn223, Asp225, Ile226, Phe227, Tyr228, Ser229, Met230, Asn233, Gly234, Arg235, Asn236, Met237, Thr238, Asp239, Glu240, Tyr242, Ala243, Glu244, His310, Pro311, Cys312, Gln363, Asp369, Thr370, Val372, Arg373, Trp374, Leu375, Thr376, Ala378, Gly379, Asp382, Arg384, Ile392, Leu393, Lys394, Ser395, Asp398, Ser399, Ile400, Ser401, Ser417, Gln418, Ile419, Ala420, Ile534, Ser535, Val537, Asp538, Glu539, Met541, Gly542, Arg543, His545, Arg546, Ile547, Asn548, Cys550, Gly551, Glu552. |
| 2 | 3083.2 | 1978.4 | Met1, Gly2, Leu3, Leu4, Thr5, Thr6, Phe33, Val36, Pro47, Leu49, Trp50, Gly51, Glu52, Glu53, Glu55, Ala73, Met76, Asn77, Val88, Asn90, Pro91, Glu92, Tyr93, Met97, Glu99, Ser100, Thr101, Pro102, Asp103, His104, Pro105, Thr175, His176, Pro177, Arg178, Phe179, Leu182, Met318, Gly321, Met322, Asn324, Ser325, Ala326, Gln328, Val329, Thr330, Met331, Gln332, Arg373, Trp374, Ile377, Tyr397, Val452, Met453, Tyr454, Met457, Thr466, Glu467, Phe469, Asp470, Asn471, Gln473, Ser474, Trp477, Gln478, Arg481, Lys483, Pro484, Pro485, Pro486, Asn489, Asp490, Ile491, Arg494, Glu496, Arg498. |
| 3 | 1849.0 | 1466.6 | Phe48, Trp50, Leu108, Ser109, Val110, Glu111, Ser112, Asp114, Gln345, Leu346, Ile348, Leu349, Ala352, Phe353, Val514, Phe515, Pro517, Leu518, Leu519, Lys521, Ala522, Ile523, Tyr526, Pro528, Phe530, Met556, Arg557, Asp559, Ile560, Phe561, Ile580, Phe581, Asn582, Gly583, Lys584, Glu585, Gly586, Gly587, Phe588, Tyr589, Gly590, Leu591, Ile592, Pro593, Leu594, Val595, Arg597, Tyr598, Leu599, Asp600, Asp601, Glu602, Gly603, Ser606, Pro607, Leu608, Val609, Asn610, Tyr612, Leu613. |
| 4 | 691.6 | 421.9 | Gly149, Asn150, Phe151, Val152, Cys154, Ser155, Asp156, Lys157, Ser158, Ser159, Gln163, Ser164, Leu165, Phe166, Val167, Pro168, Ser257, Asp259, Pro260, Arg261, Glu262, Leu273, Phe274. |
| *Lm*GCL V | 1 | 1226.690 | 994.906 | Met1, Gly2, Leu3, Leu4, Thr5, Gln32, Phe33, Val36, Phe49, Trp50, Gly51, Glu52, Glu53, Glu55, Val88, Asn90, Pro91, Glu92, Tyr93, Met97, Glu99, Thr101, Pro102, Asp103, His104, Pro105, Arg178, Phe179, Leu182, Met318, Gly321, Met322, Asn324, Ser325, Ala326, Gln328, Val329, Thr330, Met331, Gln332, Arg373, Trp374, Ile377, Tyr397, Val452, Met453, Tyr454, Met457, Thr466, Glu467, Phe469, Asp470, Asn471, Gln473, Ser474, Trp477, Gln478, Arg481, Lys483, Pro484, Pro485, Pro486, Ile491, Arg494, Glu496, Arg498. |
| 2 | 600.141 | 721.973 | Thr70, Ala73, Ser95, Gly147, Gln148, Gly149, Asn150, Phe151, Val152, Cys154, Ser155, Asp156, Lys157, Ser158, Ser159, Gln163, Ser164, Leu165, Phe166, Val167, Pro168, Ala170, Cys171, Ile172, Asn173, Gln174, Thr175, Asp239, Leu241, Leu252, Val253, Pro254, Ser255, Ser256, Ser257, Asp259, Pro260, Arg261, Glu262, Asp263, Tyr264, Pro265, Leu273, Lys364, Gly365, Leu366, Arg646. |
| 3 | 147.435 | 108.037 | Gln12, Ser158, Pro160, Tyr161, Gln163, Ala184, Arg187, Leu188, Tyr264, Leu270, Lys271, Gln272, Leu273, Phe274. |
| 4 | 118.392 | 316.376 | Phe48, Trp50, Leu108, Ser109, Val110, Glu111, Asp114, Val514, Pro517, Leu518, Lys521, Asn582, Gly583, Lys584, Tyr589, Gly590, Leu591, Ile592, Leu594, Val595, Tyr598, Leu599, Asp600, Asp601, Glu602, Gly603, Val609, Asn610, Leu613. |
